# Supplementary material
Source: PubMed Central journal article supplement (PMC4470792)
Supplement: NIHMS672861-supplement-1.pdf [file NIHMS672861-supplement-1.pdf]

| Gene Name | Forward Primer              | Reverse Primer               |
|-----------|-----------------------------|------------------------------|
| ACTB      | CTGGAACGGTGAAGGTGACA        | AAGGGACTTCCTGTAACAATGCA      |
| ACVRL1    | ACATGAAGAAGGTGGTGTGTGTGG    | CGGGCAGAGGGGTTTGGGTA         |
| ADAMDEC1  | GGGGCCAGACTACACTGAAACATT    | ACCCGTCACAAGTACTGATGCTG      |
| AHI1      | GTCCAAAACACTACCCCATCAAGGCT  | GCAGCACAGGAACGTATCACCT       |
| ANGPT2    | TGGCAGCGTTGATTTTCAGAGG      | GCGAAACAAACTCATTTCAGCC       |
| ANPEP     | TGAAGAAGCAGGTCACACCCCT      | AACTCCGTTGGAGCAGGCGG         |
| APOA1     | GCCGTGCTCTTCCTGACGG         | TGGGACACATAGTCTCTGCCGC       |
| ATXN7     | CACCGCCACTCTGGAAAAGAA       | GGGTGCAGGGCTTCTTGGTG         |
| B2M       | TGCTGTCTCCATGTTTGATGTATCT   | TCTCTGCTCCCCACCTCTAAGT       |
| BAG4      | AGGTTCCAGGATATCCGCTT        | TCGGTCTGATTGTGGAACACT        |
| BCL2      | ACAACATCGCCCTGTGGATGA       | CCGTACAGTTCACAAAAGGCAT       |
| BCL2L14   | GCTCAGGGTCAAAGGACGTTGG      | TCAGTACTCGGTTGGCAATGG        |
| BCL7A     | GAACCATGTCGGGCAGGTCG        | CCCATTTGTAGATTTCGTAGGGATGTGT |
| BIN1      | TGCTGTCGTGGTGGAGACCTTC      | GCCGTGTAGTCGTGCTGGG          |
| BIRC3     | TGCTATCCACATCAGACAGCCC      | TCTGAATGGTCTTCTCCAGGTTCA     |
| BIRC5     | TTCTCAAGGACCACCGCATCT       | AGTGGATGAAGCCAGCCTCG         |
| BLK       | TCGGGGTCTTCACCATCAAAGC      | GCGCTCCAGGTTGCGGATGA         |
| BTRC      | CCAAATGTGTCATTACCAACATGGGC  | GCAGCACATAGTGATTTGGCATCC     |
| BUB3      | CGGAACATGGGTTACGTGCAGC      | CCAAATACTCAACTGCCACTCGGC     |
| CAGE1     | TCCAAAATGCACAGTCTTCTGGCT    | GGAGGCTCTTCAGTTTTTGCAGC      |
| CASP1     | CCTGTTCTGTGATGTGGAGGAAA     | GCTCTACCATCTGGCTGCTCAA       |
| CASP3     | AGCGAATCAATGGACTCTGGAATATCC | GTTTGCTGCATCGACATCTGTACCA    |
| CCL5      | TCATTGCTACTGCCCTCTGCG       | ACTGCTGGGTTGGAGCACTTG        |
| CCL18     | CCCTCCTTGTCTCGTCTGCA        | GCACTGGGGGCTGGTTTCAG         |
| CCL26     | TTCCAATACAGCCACAAGCCCC      | GGATGGGTACAGACTTTCTTGCCCTC   |
| CCND2     | TCAAGTGCGTGCAGAAGGACAT      | CTTCGCACTTCTGTTCCCTCACA      |
| CCND3     | TGGCTGCTGTGATTGCACATGA      | GATGGCGGTTACATGGCAAAGG       |
| CCR3      | ACGCTGCTCTGCTTCCTGG         | TCCTCAGTTCCCCACCATCGC        |
| CCR4      | AGCATCGTGCTTCTGAGCAA        | GGTGTCTGCTATATCCGTGGGGT      |
| CCR7      | AGACAGGGGTAGTGCGAGGC        | CTGGAAAATGACAAGGAGAGCCACC    |
| CD164     | AAACCTGTGAAGGTGCAAACAGCT    | AGTCTGTCGTGTTCCCACTGA        |
| CD1D      | CACGTTACGCGACCAGCAGTG       | CTCACAGCCAGCGGACACCT         |
| CD22_A    | CATCCTCATCCTGGCAATCT        | CTCTGCATCTCCAGTTCGTG         |
| CD22_B    | TTTTTGAGCACCTGAAACC         | CGGATACCCATAGCAGGAGA         |
| CD274     | ACCAGCACACTGAGAATCAACACA    | GTCCTTTCATTTGGAGGATGTGCCA    |
| CD52      | CCTCTACTACCATCAGCCTCC       | TGCTACCAAAGCTGCCTCCTGG       |
| CD7       | GGACAACCTGACTATCACCATGCA    | TCCGAGCATCTGTGCCATCCTT       |
| CD70      | TGGGACGTAGCTGAGCTGCAG       | GTCGTGGAGGAGCAGATGGC         |
| CDKN1C    | AGATCAGCGCCTGAGAAGTCGT      | CTCGGGGCTCTTTGGGCTCT         |
| CDKN2A    | GGCACCAGAGGCAGTAACCAT       | AGCCTCTCTGGTCTTTCAATCGG      |
| CDKN2B    | GGGGCTGGAACCTAGATCGCC       | CGGTCGGGTGAGAGTGCCA          |
| CDO1      | ACAGTCCACCTTTTGATACATGCCA   | GCCCCTTAGTTGTTCTCCAGCG       |
| CHD1      | AGACCGACATCAGGGAGATTCTTACA  | CCTGTGATCATCCAGTTTCTGTGTTT   |
| CHD7      | GGCACAGCTCCACCCATCAC        | CTGAGTCATATCCGGCACTGGTTT     |
| CLU       | CGCCACAACCTCCACGGGCTG       | GTCAACCTCTCAGCGACCTGGA       |
| CNOT3     | CGTCCGTCTCCAAGAGAGTATGAAGA  | CAAACCTGCTCCACGCCCTCG        |
| CR592140  | ACCAGTGA AATTGACCTGCCCG     | GCCCCAACCGAAATGTTTAACGC      |
| CST6      | CTGACGATGGAGATGGGGAGCA      | GCCAGGGAAACCACAAGGACC        |
| CTAG1A    | CGTGCCAGGGGTGCTTCTGA        | TGCGTGATCCACATCAACAGGG       |

|        |                              |                               |
|--------|------------------------------|-------------------------------|
| CTAG2  | CAGGGGCAGCAAGGGCC            | GCGACGAGAAAGGCATCGTGAT        |
| CTAGE1 | TCCTTACCGTCCCCAAGACCT        | GCTGTGCTTCTGGATGTTTCAGCA      |
| CTLA4  | AGCTGAACCTGGCTACCAGGAC       | ACACAAAGCTGGCGATGCCT          |
| CTNNB1 | TGGATACCTCCCAAGTCTGTATGAG    | TGCCCTCATCTAATGTCTCAGGGA      |
| CXCL9  | TGCTGGTTCTGATTGGAGTGCAA      | AGGAAGGGCTTGGGGCAAATTG        |
| CXCL11 | CAGCAGCACCAGCAGCAACA         | TGCAAAGACAGCGTCTCTTTTGA       |
| DDX53  | TGGAAGAGGGCGGAGGCTAATC       | AAAGCAGAGTGGTGGTTCACGG        |
| DMAPI  | GCGCGGATGTACGGGACATTC        | CCTCGGGCCTCTTGAAAGTCAG        |
| DMC1   | TGCAATGTCAAAGGACTCTCAGAAGC   | CCCGGTGGTGATATGGAAAACCA       |
| DNM3   | CTCCAGCCAACACTGATCTTGCA      | CTGGCATCCGTTCCCTTCATCCA       |
| DPP4   | TGGTATCAGATGATCTTGCCCTCTCA   | CCACTTCTCTGCCATCAAAGCT        |
| E2F1   | ATGGTGATCAAAGCCCCTCCT        | TCGATCGGGCCTTGTTTGTCT         |
| E2F4   | AGATACCCTCTTGCCATCCG         | GTGAATCTGGTACTTCTTCTGCCC      |
| EED    | TGCGGCCAAGAAGCAGAAGC         | TGCATTTGGCGTGTGTTGTAGGTG      |
| EP400  | TGCCCCACCAAACCACAGA          | TGCTTTCCTCAGCTCCGCAATG        |
| EPHA4  | GGCAGATGGTGAATGGCTGGT        | GAGTAGCTGTGGGGTGGGCA          |
| ESRRB  | CGGGGACATTGCCTCTGGCTA        | TGATCTCGCACTCGTTGGTGGC        |
| EZH2   | AAAATTATGATGGGAAAGTACACGGGGA | CTTCTCTTTCTTCAGGATCGTCTCCATC  |
| FAS    | AACCATGCTGGGCATCTGGA         | GTTGATGTCAGTCACTTGGGCA        |
| FASTK  | AGGAAACGCAACTCAGCAGCAA       | TGCCACCCCTGCTTCCCGA           |
| FCRL3  | CCCAGCACAGTCATGGAGTGAG       | GTGTCATCCTCGTGATAAAAACCAGTACA |
| FLT4   | CCTGACACGCTCTTGGTCAACA       | CCGGTCATCCCACACCACCT          |
| FOSL1  | CGGAGGAAGGAAGTACCGACT        | TTCCAGCACCAGCTCTAGGCG         |
| FOXP3  | AGCTCCTACCCACTGCTGGC         | TGCCCTGCCCTTCTCATCCAG         |
| FYB    | CCTCCCTGTTTACCTTGGGTCC       | GTGGAGGTGGTGGCAGGGAA          |
| GAGE6  | ACAGCCTCCTGAAATGATTGGGC      | TGCTCCCTCATCCTCTCCCTCC        |
| GATA3  | GGCAACCTCGACCCCACTGT         | CGTCCCTGCTCTCCTGGCTG          |
| GATA6  | TGAACCCGTGTGCAATGCTT         | TTTCATAGCAAGTGGTCTGGGC        |
| GNLY   | TGGTCTTCTCTCGTCTGAGCCC       | CCCAGCTCCTGTGTTTTGGTCA        |
| GTSF1  | GCAGACCAGCACCCCATTTGTC       | GGCAGAGATTTGGGAAGTCCGA        |
| HCK    | GGGGTGCATGAAGTCCAAGTTCC      | CTGGTGTGTTGCTGTTGTGGCT        |
| HDAC1  | CGATGGCCTGTTGAGTTCTGTCA      | TCGGACTTCTTTGCATGGTGCA        |
| HDAC2  | TGGCGTACAGTCAAGGAGGCG        | AGCAAGTTATGGGTCATGCGGATT      |
| HIF1A  | ACCCTAACTAGCCGAGGAAGAAGTATGA | AGGTGGTTTCTTATACCCACTGAGG     |
| HMBS   | GCTTCACCATCGGAGCCATCT        | TGGCAGGGTTTCTAGGGTCTT         |
| IFI35  | TGGGGCTGAGAGAGACCACAG        | CTGAAGGGCGTGGAGGGC            |
| IFNG   | GCATCGTTTTGGGTTCTCTTGGC      | CCGCTACATCTGAATGACCTGCA       |
| IGFL2  | TCTGTCTCCTCCTCTTGTGTCCAA     | CGGGTCTCGCTCAGGGACA           |
| IK     | CCCATGGACGTTGACAAAGGA        | CAGCAGACCCAGCAAACCTTTCA       |
| IL1F7  | GGACAAAGTCATCCATCCCTTCAGC    | CCGACTCCAGCATGTTCCAGG         |
| IL1RN  | GCCGACCCTCTGGGAGAAAAT        | TGGTTGTTCTCAGATAGAAGGTCT      |
| IL2    | CCAAACTCACCAGGATGCTCACA      | ACGTTGATATTGCTGATTAAGTCCCTGG  |
| IL2RA  | GAAAGACCTCCGTTCACTGCC        | GGATCTCTGGCGGGTCATCGT         |
| IL4    | GCAGTTCACAGGCACAAGCA         | GGTTGGCTTCTTCACAGGACA         |
| IL5    | GCTGATAGCCAATGAGACTCTGAGG    | TCCACAGTACCCCTTGACACA         |
| IL7R   | AGTGAATGGATCGCAGCACTCAC      | AAATTCAGGCACTTTACCTCCACGA     |
| IL9    | TGACCAGTTGTCTCTGTTTGGGC      | TGGGTATCTTGTGTTGCATGGTGGT     |
| IL10   | AGGAGGTGATGCCCCAAGCTG        | GCCTTGCTCTGTTTTACAGGG         |
| IL12A  | TGGCAGTTATTGATGAGCTGATGCA    | AGCATGAAGAAGTATGCAGAGCTTGA    |
| IL13   | GCATGGTATGGAGCATCAACCTGA     | CCTCTGGGTCTTCTCGATGGCA        |

|         |                              |                              |
|---------|------------------------------|------------------------------|
| IL15    | AGGCATTGTGGATGGATGGCTG       | AACACAAGTAGCACTGGATGGAAATACT |
| IL17A   | GTCAACCTGAACATCCATAACCGGA    | GCACTTTGCTCCCAGATCACA        |
| IL17F   | TCACGTAACATCGAGAGCCGC        | TGGAGATGTCTTCCTTTCCTTGAGCA   |
| IL17RA  | TGCCACACCCAACAAGGAGA         | ACTCAAACCTGACGCACAAACGT      |
| IL17RB  | CGAGCTTCAGTGGTATTCCAGT       | GCCTGTTTGTGGGCAGAGCA         |
| IL17RC  | ACTGGACCGCAGATCATTACCTTG     | CTGAAGGGGCAGATGTTTCGTCC      |
| IL18    | TCATTGACCAAGGAAATCGGCCTC     | TCACACTTCACAGAGATAGTTACAGCCA |
| IL21    | TCTGCCAGCTCCAGAAGATGTAGA     | TCTCCCTGCATTGTGGAAGGTG       |
| IL21R   | AAGGAAGGCTGGAACCCCTACC       | GGGGCATGAAGAACCGCTCAG        |
| IL22    | CCCTTGAAGAAGTGCTGTTCCCT      | TCAGCTTTTGCACATTCTCTGGA      |
| IL23A   | TGCTCCCTGATAGCCCTGTGG        | TTTGAAGCGGAGAAGGAGACGC       |
| IL23R   | AGTGCCCAAGACCATAATTTATTGGGAT | TCCAAGTAGAATTCTGACTGTTGCACA  |
| IL26    | TCCTGTGCTTCATCAGCTAGAGAGA    | GGCTTTGGTTTACTGACTGCTTTCC    |
| IL32    | CCTTGGCTCCTTGAACTTTTGGC      | CATTCGGGCCTTCAGCTTCTCA       |
| IRF1    | CGCTGTGCCATGAACCTCCCTG       | AGCATCTCGGCTGGACTTCGAC       |
| IRF3    | CCAGCCAGACACCTCTCCGG         | GCAGGGCTCAGGGGCTACAG         |
| IRF4    | TATGCTTGTGCCCCACCTGAGT       | ACGTGGTCAGCTCCTTCACGA        |
| IRF7    | CTGGGCTTCGGGCAGGAC           | AGGGAAGACACACCCTCACGC        |
| ITK     | GGCTCAACAAGGACAAGGTGGC       | TCCAGGCACACCCCATACAGC        |
| JARID2  | AGGCTAGTGGAAGAGAAGGACTGC     | CCTGTGTTATTGGGGAGGACGG       |
| JUNB    | GAACGCCTGATTGTCCCAACA        | CGAAGCCCTCCTGCTCCTCG         |
| KAT5    | TCCTGAGCGTGAAGGACATCAGT      | GCCTCTTCTTGGGGAAGTGGATC      |
| KIR3DL2 | TGCATGTTCTGATTGGGACCTCAG     | TTCCTGTTCTGTCCCCCGCA         |
| KIT     | GCACCGAAGGAGGCACTTACAC       | GCTGCCACACATTGGAGCATG        |
| KLF4_   | ATCTCAAGGCACACCTGCGAA        | ATCTGAGCGGGCGAATTTCCAT       |
| KLHDC5  | GGATGCGTGGAATTTTGTGGCG       | CATGTGCGAAGAGGGGCAGTAC       |
| LCE2B   | TGCTCCTGCGTGTGACCAGG         | GGGGCAGGCATTTAGGGGGAC        |
| LCK     | GGAGATCTGGGCTTTGAGAAGGGG     | GCCACAAAATTGAAGGGGATGAAGC    |
| LEF1    | AGCGAATGTCGTTGCTGAGTGT       | AGCTGTCTTTCTTCCGTGCTAATTCA   |
| LIF     | TGCCATACGCCACCCATGTCA        | CAGGTTGTTGGGGAACGGCT         |
| LOR     | CTCTCCTCACTCACCTTCCTGG       | CCACCGCCGCCAGAGGTCTT         |
| LTA     | ACAGCACCTCAAACCTGCT          | CGGTCCGTGTTTGCTCTCCA         |
| LTBP4   | CGGCATCTGTACCAACACCGAC       | CTGCGACCCGCACAGGG            |
| MAGEA9B | AACCAGGAGGACAGGAGCCC         | CATCAGGCCCAAGTCTCTCCT        |
| MAL     | CTTGCCCGACTTGCTCTTCATCT      | CCACGAAGCAGAACACAGACACG      |
| MAX     | ACGGGCTCATCATAATGCACTGG      | TGTGGCTTTGTCTAGGATTTGGGC     |
| MCL1    | AAGGACAAAACGGGACTGGCT        | CACATTCCTGATGCCACCTTCT       |
| MDM2    | CCGTGAAGGAAACTGGGGAGTC       | CGAAGCTGGAATCTGTGAGGTGG      |
| MIR155  | CTGTTAATGCTAATCGTGATAGGGGT   | AATGCTAATATGTAGGAGTCAGTTGGAG |
| MIR203  | TGGGTCCAGTGGTTCTTAACAGTTC    | TCGCTGTGCGCCGCGC             |
| MIR205  | AAAGATCCTCAGACAATCCATGTGCTT  | TGTCAGCTCCATGCCTCCTGAA       |
| MMP2    | CACTGCGGTTTTCTCGAATCCA       | TTACCGTCAAAGGGGTATCCATCG     |
| MMP9    | TTCGACGATGACGAGTTGTGGT       | CGAAGATGAAGGGGAAGTGGCA       |
| MMP12   | GCCGTAATGTTCCCCACCTACAA      | TCAGGATTTGGCAAGCGTTGGT       |
| MOS     | TGCTGTGCTTCCAGACACCCT        | CCTGCTTGGTAGTCATTTGCCAGA     |
| MPZL2   | TGGGTTTCCCTCATGTATGGCAAG     | CATTAACAGCCTCCAGCACCCG       |
| MRC2    | CAGGACTACGGCAAAGACGAGC       | GCCTCCCTCCACGACAGCGT         |
| MTF2    | ACTGAGGGAAGTGCACATTCATCC     | GGCCAAGATCTTCTGTACGCG        |
| MXI1    | CCCGGCACACAACACTTGGTTT       | CGCCACTTTAAAATCTCTGTTCTCGTT  |
| MYB     | GTCATGTTCCATAACCTGTAGCGTT    | CTGCTATCCCCTCATTCAAGCACA     |

|             |                              |                              |
|-------------|------------------------------|------------------------------|
| MYC         | GAGACACCGCCCACCACCAG         | TCCAGCAGAAGGTGATCCAGACT      |
| NANOG       | TTCCTGGGTCCAGAGAGAATTACC     | TCCAGCCGTAGTTCTTCGTAAGC      |
| NAV3        | TGGATCCAGCTTGTCCCCAAA        | AGGCCACAAATCACAGGCATA        |
| NEED4L      | ACCTCTGGTTTCCCCTTCTGCC       | AGTCTTGGGCTGGGATGCTGTT       |
| NFKB1       | AGGATCTCGGACCAGCCCTCA        | TGACACTGCATGACCTCAACCTTG     |
| NFKB2       | TGCAACTATGTGGGACCAGCAA       | AGTGTTTTCCACCAGGCTGT         |
| NKG7        | GAGATGGAGGAGCTGGGGTTGG       | CAGAAGGAGGCGGGTGAGGG         |
| NKIRAS2     | GCCTCCACACCCCCAGATCC         | TCTGCTCACAAGGTTTCATAGCCAG    |
| NOTCH1      | TGCTCAAGAAGGAGATTGACAAATCCA  | ACACCTCCCACAGCTTCACCTT       |
| NR0B1       | AGCTGGACCCCATGGACG           | GGTGGCACTCTGGAAGCACT         |
| NR0B1       | AGGGGACCGTGTCTTTAAACC        | AGTTCGATGAATCTGTCATGGGGC     |
| NUB1        | GTTGCAAGGCAATTGAGCGTGG       | GCCAGTGATGTGCAATCGGGTC       |
| PALM2-AKAP2 | TGCCGAAGAGGAGGAAGCCAG        | TCTGGGACTCTTCACTTTCTAGCGT    |
| PDCD1       | TCGTCTGGGCGGTGCTACAA         | GGTGAAGGTGGCGTTGTCCC         |
| PHC1        | CCAAACACCAGCACTACACAGCA      | GCACAGATTGGGTCAAGGTGGT       |
| PIP5K1B     | ACACTGTTTCTGTTTCATAGACCAAGCT | AGGGCGGCGATTGAATTGCAC        |
| PLK1        | AGTACCTGCACCGAAACCGAGT       | GGGTCTTCTTCTCTCCCCGTC        |
| PLS3        | ACTCTCTGGTGTCAATCCTCACGT     | TCCAGTTTTCGGGTATGGAGGT       |
| POU2AF1     | GGGGCTCAGATAAGTCCCTCTCTGG    | GTGGTTTGCCACAGCTAATTTTCA     |
| POU5F1      | TGCAAAGCAGAAACCCTCGT         | TCGGGCACTGCAGGAACAAAT        |
| PRDM2       | ACACTACTGAGCCTGTGGCGG        | TGCCTTTTAAAAATTGGTTTAGTGGCCC |
| PSMD3       | GGCCCTAGACCTTGTAGCCGC        | CATGCCGAAGCGTAGCTGTCC        |
| PSORS1C2    | CAGCTTTGGGGGCCAGTACAT        | CCTCTGCGGTGGGTGAGAG          |
| PTEN        | ATTCCAGTCAGAGGCGCTAT         | TCATCTTGTAACAACAGTGCCA       |
| PTGS2       | ACAGGCTTCCATTGACCAGAGC       | ACCATAGAGTGCTTCCAACCTCTGC    |
| PTPN6       | GGGCATGGTGCAGACGGAGG         | TGGCTGGGGGATAGGTGATGTT       |
| PTPN7       | CCAGGACATGAAAGAGTGCCAG       | AGCTGATTCTGGTGTCTGATGGTCT    |
| PTPRG       | TGGAAGCCATTCCTGTCAAACAGT     | TGCAGTGATGTTTCATATCAGCAGTACA |
| RAC2        | GCCAATGTGATGGTGGACAGCA       | TGACGAGGGAGAAGCAGATGAGG      |
| RASA1       | ACGATAGCAGAAGAACGCCTCA       | AAAGTACAAAGGACCCTGGCCTC      |
| RB1         | CAGATGGTATGTAACAGCGACCGT     | TCAGTGGTTTAGGAGGGTTGCTTC     |
| REC8        | TGATGGAGACCCTAGAAGATGCTCC    | ACTCTCTTGGGATTGCAGCCT        |
| RHOF        | GCGTGACCGTTGGCAGCA           | CGTTGTCGTAGCTGGTGGGATT       |
| RNF2        | GCCTCATCCCACACTTATGGAAAAAGA  | AGTTCTTCTAAAGCTAACCTCACAGCC  |
| SALL4       | ACCCAGCATCTGGCTAAAACAC       | GTGGCTTCATCCTCACTCGCCA       |
| SCPEP1      | TGCAGAGCAAGTACTGAATGCCG      | TCCATTGTAGACGTGGGAGTGCT      |
| SDC4        | GGCCCTGAAGTTGTCCATCCCT       | CATCCTCACTCTCTTCAACGGGTG     |
| SDHA_1      | TGGGAACAAGAGGGCATCTG         | CCACCACTGCATCAAATTCATG       |
| SDHA_2      | TGTTGATGGGAACAAGAGGGCA       | GCCTACCACCACTGCATCAAAT       |
| SELL        | CAGGCAAATGGAACGATGACGC       | ACCCACATCACAGTTGCAGGT        |
| SERPINB4    | ACCAGTGTGGAATCTACTGATTTTGCA  | TCGTATCATTGCCAATAGTCCCATCAG  |
| SERPINB5    | CTCACTGAAACTAATCAAGCGGCTC    | CCTTGCATACGGTCTCTTCGT        |
| SERPINB13   | TGTGCTTCTGCCAACGACATC        | ACCGTCTCCACCTCAAACCG         |
| SH2D1A      | AGTCCTCAGCTAGAAGTACACAAGGT   | TGCATTTGTAGCTCACCGAAGTGT     |
| SKAP1       | TTTGGATCGGAGTGGCAGAAGC       | GCCATCCGTACACCGTAGCCC        |
| SMAD1       | CAAGAATTTGCTCAGTTATTGGCACAGT | TGGCGGTGGTATTCTGCTCCC        |
| SMAD2       | GCTTGAGAAAGCCATCACCCTC       | CTCAGTCCCCAAATTTAGAGCA       |
| SOCS3       | AGCCCCAAGGACGGAGACTTC        | CGGGAACTTGCTGTGGGTGAC        |
| SOX2        | TGAACCAGCGCATGGACAGTTA       | CATCATGCTGTAGCTGCCGTT        |
| SPO11       | ACAGAGCAACACTTATGCAACCAAAAAG | ACTCCTCCTTGACACTTTTAAACATGCA |

|          |                              |                               |
|----------|------------------------------|-------------------------------|
| ST8SIA1  | TGTTGGCTCTACATCTTCCCCGT      | GGTCGCAGCAGTCTTCCATTTGT       |
| STAG3    | TGACAGGGACTCAAACCATACCTCA    | TGTTTTCGGTGGTCGTTTTGCTG       |
| STAT1    | TGATCTCCAACGTCAGCCAGC        | GCCAACTCAGCACTTCTGAAAGC       |
| STAT2    | CATTGGAGGGCGCGGGGACT         | TCGAATGTCCACAGGCAGGAGG        |
| STAT3    | ATGCGGCCAGCAAAGAATCA         | AGCGGCTATACTGCTGGTCAAT        |
| STAT4    | GGAAATTTCGGCATCTGTTGGCC      | TTCTCTTTGGAAACACGACCTAACTGT   |
| STAT5A   | TGGCAGTGGTTTTGACGGGGT        | GTCGGGCTTGTGATGAGCAGG         |
| STAT5B   | ACTGAAGATCAAGCTGGGGCA        | ACAATATATGGCGGATGCAGCG        |
| STAT6    | GGCCACTTTCAGACAAATACTTCAAGGA | TGCAGCCTCCGCAAGCCT            |
| SUZ12    | TCATCGCCAACCTGGATTTGCT       | ATGTTCTTTGCTGTTCTACTTCCCCAT   |
| SYCP1    | CCACCAGCTTCTCATCTTTGTGTCA    | AGCAATTACAGCCCAACGGTCC        |
| SYCP3    | ACCAAGGCTTCTCTCAAAACTAGTAACC | ATCCCACTGCTGAAACAAAGTCAGA     |
| SYK      | TCTTTTTTCGGCAACATCACCCG      | GCGCAGCAAATAAAGCCCATCA        |
| TBX3     | CTGGAGGCTAAAGAACTTTGGGATCA   | ATCCAGCCCAGAACATCTCACTTTAAAT  |
| TBX21    | ACGCTTCCAACACGCATATCTTTACT   | GTTCTCCCGGAATCCTTTGGCA        |
| TCF3     | CCTGTTTGAACGGCGAGAAGA        | TGGGGAGCTGAAAGCACCAT          |
| TCF7L1   | ACCGTATTACCCACTCTCTCCCG      | ATCGAGGCGTTCATGGCGAG          |
| TGFB1    | AGTTGTGCGGCAGTGGTTGA         | CTTGCAGTGTGTTATCCCTGCT        |
| THAP11   | CCAAAGGACGCTGAGTTGCGG        | CGTACCGTGTAGGTCTTGCGG         |
| THBS4    | AGTTCAGCCACCATCTTCGGTCT      | AACCACCAAATGCACCTTCCA         |
| TIMP1    | AGATCCAGCGCCAGAGAGA          | AGCAACAACAGGATGCCAGAAG        |
| TLR7     | TGCTCTCTCAACCAGACCTCTACA     | AGTTTTAGGAAACCATCTAGCCCCAAG   |
| TNFRSF4  | ACACCTACCCAGCAACGACC         | CACGGCTTGAGCTGACCAC           |
| TNFRSF8  | AGCTCCACCTGTGCTACCCG         | CGTTGAGCTCCTCCTGGGTCTG        |
| TNFSF10  | TGCAGTCTCTCTGTGTGGCT         | GCCACTTTTGGAGTACTTGTCTG       |
| TNFSF11  | TGGTGGATGGCTCATGGTTAGATCTG   | CAAGAGGACAGACTCACTTTATGGGAAC  |
| TNFSF13B | TGCAGGGCCACCACGCG            | TGCTGTTCTGACTGGAGTTGCC        |
| Tox      | TGAGCATGACAGAGCCGAGCC        | CAGCGAGTGGTCTGGGAGGG          |
| TP53     | ACCATGAGCGCTGCTCAGATA        | CCACACGCAAATTTCTTCCAC         |
| TP63     | CGGAGGTGGTGAAGCGGTGC         | GCACACTCTGTCTTCTGTGATGG       |
| TP73     | AGCTCGGGAGGGACTTCAAC         | AGGGTCATCCACATACTGCGA         |
| TRAF2    | ACCGTACTGCTCCTTCTGC          | TCGTGAACACAGGCAGCACA          |
| TRAF3IP3 | TGACCACCTCTCCTCACAGGCT       | TTGGTTTGCTGACTGGCATCGT        |
| TRIM28   | CCCCACAGGAGTTTGCCAG          | GCACAGCAGAGAACTTGGTGTC        |
| TRIP13   | GAGTCGCCAACGGTCCACGT         | AAGGTTTCATCAAACCTCAGTCCATGTGT |
| TRRAP    | GTCCACGCTGATGTTGGAGCA        | AGGGAGTAAAGCTCCGCAAGGG        |
| TTR      | AGTCTGGAGAGCTGCATGGGC        | CGGAGTCGTTGGCTGTGAATACC       |
| TWIST1   | TCCATGTCCGCGTCCACTA          | AGCTCCATCCTGGTGTACCTT         |
| VEGFC    | GCCAACTCAACTCAAGGACAGA       | CCCCACATCTATACACACCTCCCG      |
| WIF1     | GAATTCCTGTCTTTCGCGTCCC       | CTGCCACCCCATCCTGTTTTCC        |
| DIABLO   | TGCAGTTGGTCTTTCAGAGATGGC     | AGCTTGGTTTCTGCTTTCGGG         |
| XTP6     | AGAGTGGAGGCTGGAAGGATGG       | TCAGCACAAGGCAAGGATGCTC        |
| YWHAZ    | TCCCCAATGCTTACAAGCAGA        | TCTTGTTCATCACCAGCGCAA         |
| ZAP70    | ACCCGAATGCATCAACTTCCGC       | CTTGCCCTGCTCGATGAAGGC         |
| ZBTB16   | CCTGGATAGTTTTCGGGCTGAGAA     | ATGGGTCTGCCTGTGTGTCTCC        |
| ZFX      | GTTGAACTGCTTGTATCAGAACAGCAG  | TCGGCATGAAGGTTTTGATTTTCATTGTC |

**Supplementary Table 1.** Primers used for RT-PCR experiments.

| Gene Name                                                                     | Putative biological role and importance in cancer/CTCL.                                                                                                                                                                                                                                                                                                                                                                                                                                                                                                                                                                                                                                                                                                                                                   |
|-------------------------------------------------------------------------------|-----------------------------------------------------------------------------------------------------------------------------------------------------------------------------------------------------------------------------------------------------------------------------------------------------------------------------------------------------------------------------------------------------------------------------------------------------------------------------------------------------------------------------------------------------------------------------------------------------------------------------------------------------------------------------------------------------------------------------------------------------------------------------------------------------------|
| <b><u>Part A. Genes upregulated in Cluster 1 poor prognosis patients.</u></b> |                                                                                                                                                                                                                                                                                                                                                                                                                                                                                                                                                                                                                                                                                                                                                                                                           |
| IL-26                                                                         | IL-26 is one of the cytokines produced by the Th17 cells <sup>1</sup> .                                                                                                                                                                                                                                                                                                                                                                                                                                                                                                                                                                                                                                                                                                                                   |
| IL-21 and IL21R                                                               | IL-21 is one of the cytokines produced by the Th17 cells <sup>1</sup> . Autocrine IL-21 stimulation was shown to be involved in the maintenance of constitutive STAT3 activation in SS <sup>2</sup> .                                                                                                                                                                                                                                                                                                                                                                                                                                                                                                                                                                                                     |
| IL-17A and IL-17F                                                             | Both cytokines are typically produced by the Th17 cells <sup>1</sup> . As addressed in the discussion, there remains an uncertainty whether IL-17 signaling plays an important role in CTCL or whether it is seen as a secondary epiphenomenon. Aberrant constitutive activation of JAK/STAT signaling has been documented in CTCL <sup>3</sup> . This constitutive activation of signaling was shown to result in IL-17 production <sup>3</sup> .                                                                                                                                                                                                                                                                                                                                                        |
| IL-22                                                                         | IL-22 was initially thought to be produced by Th17 cells. Later it was shown that IL-22 production can also occur in a unique Th22 subset of cells that lack the ability to produce IL-17 and interferon- $\gamma$ <sup>4</sup> . IL-22 was proposed to be a dominant cytokine in the tumor microenvironment of CTCL lesional skin <sup>5</sup> .                                                                                                                                                                                                                                                                                                                                                                                                                                                         |
| IL2RA                                                                         | IL-2R $\alpha$ chain constitutes a part of the high affinity three chain IL-2 receptor. IL-2R $\alpha$ expression is restricted to T cells that recently encountered an antigen, while in healthy individuals the majority (i.e. >95%) of peripheral T cells are IL-2R $\alpha$ negative. IL-2R $\alpha$ was shown to be expressed in patients rejecting allografts, in autoreactive T cells from patients with autoimmune conditions <sup>6</sup> . CTCL malignant cells were shown to constitutively express this protein, which is driven by STAT3 activation <sup>7</sup> . In MF skin and SS circulating T cells IL-2R $\alpha$ is upregulated in up to 50% of cases. Interleukin-2 diphtheria toxin fusion protein (denileukin diftitox) is designed to target IL-2 receptor in CTCL <sup>6</sup> . |
| ITK                                                                           | ITK (Interleukin-2 inducible T-cell kinase) is a member of the Tec kinase family of non-receptor tyrosine kinases. It plays an important role in T-cell signaling. Together with other T-cell specific tyrosine kinases (e.g. LCK and ZAP-70) ITK amplifies signals transmitted via a T-cell receptor cascade. Abnormal activity of this cascade was shown to lead to autoimmune disorders and inflammation. ITK-SYK translocations were observed in Peripheral T-cell lymphomas (PTCL) <sup>8</sup> .                                                                                                                                                                                                                                                                                                    |
| LCK                                                                           | LCK (lymphocyte-specific protein tyrosine kinase) is a member of the Src family of protein tyrosine kinases and plays an important role to amplify signals transmitted via a T-cell receptor cascade. Previous cytogenetic studies demonstrated that LCK gene can fuse together with the TCR $\beta$ subunit to produce a fusion protein in T-cell acute lymphoblastic leukemia via t(1;7)(p34;q34) translocation. This gene is overexpressed in PTCL. LCK was shown to be able to identify SS from normal control samples <sup>9</sup> .                                                                                                                                                                                                                                                                 |
| FYB                                                                           | FYB is an adaptor protein involved in T cell signal transduction pathways. This gene is expressed in T cells, myeloid cells and is believed to promote positive regulation of T cell activation, integrin-mediated adhesion and IL-2 production <sup>9</sup> .                                                                                                                                                                                                                                                                                                                                                                                                                                                                                                                                            |
| GNLY                                                                          | Granulysin is a cytolytic granule protein, which is expressed in cytotoxic T cells and NK cells. Granulysin is implicated in a variety of diseases including infection, cancer, transplantation, autoimmunity and drug eruptions. Cytolytic proteins including granzyme B and perforin were previously documented to play critical pathophysiological roles in NK/T cell lymphomas. Increased levels of this gene were detected in NK/T cell lymphomas and anaplastic large cell lymphomas (ALCL) cases <sup>10</sup> .                                                                                                                                                                                                                                                                                   |
| GTSF1                                                                         | GTSF1 (Gametocyte Specific Factor 1) is a cancer testis antigen ectopically expressed in CTCL <sup>11</sup> and was reported to be a part of a molecular signature that is specific to this cancer <sup>12</sup> .                                                                                                                                                                                                                                                                                                                                                                                                                                                                                                                                                                                        |
| SYCP1                                                                         | SYCP1 (Synaptonemal complex protein 1) is a cancer testis antigen ectopically expressed in CTCL <sup>11</sup> . The normal function of this gene is to regulate crossing over in meiosis <sup>11</sup> .                                                                                                                                                                                                                                                                                                                                                                                                                                                                                                                                                                                                  |

|         |                                                                                                                                                                                                                                                                                                                                                                                                                                                                                                                                                                                                                                                                                                                                                                                                                                                                                                                                                 |
|---------|-------------------------------------------------------------------------------------------------------------------------------------------------------------------------------------------------------------------------------------------------------------------------------------------------------------------------------------------------------------------------------------------------------------------------------------------------------------------------------------------------------------------------------------------------------------------------------------------------------------------------------------------------------------------------------------------------------------------------------------------------------------------------------------------------------------------------------------------------------------------------------------------------------------------------------------------------|
| POU2AF1 | POU2AF1 is a B cell-specific transcriptional factor. This gene is essential for B cell maturation and germinal center formation <sup>13</sup> . Previous research demonstrated ectopic expression of B cell specific genes in CTCL, as in the case of BLK gene <sup>14</sup> .                                                                                                                                                                                                                                                                                                                                                                                                                                                                                                                                                                                                                                                                  |
| CHD1    | CHD1 (Chromodomain-helicase-DNA-binding protein 1) is an embryonic gene, whose activity is required to maintain open chromatin of pluripotent mouse embryonic stem cells <sup>15</sup> .                                                                                                                                                                                                                                                                                                                                                                                                                                                                                                                                                                                                                                                                                                                                                        |
| TOX     | TOX is a transcription factor, which is essential for early development of CD4 <sup>+</sup> T cells and is normally not expressed in mature CD4 <sup>+</sup> T cells. Previous studies demonstrated that the CD4 <sup>+</sup> T cells in CTCL ectopically express TOX, which causes the proliferation/apoptosis balance to shift toward proliferation by suppressing the transcription of several tumor suppressors. It was previously proposed that targeting TOX activity may be a promising treatment strategy for CTCL. TOX expression was independently found by two separate laboratories to be a robust diagnostic and prognostic marker for this cancer <sup>16,17</sup> .                                                                                                                                                                                                                                                              |
| TCF3    | TCF3 (Transcription factor 3) is a member of Tcf/Lef transcription factor family. LEF1 and TCF1 are required for transactivation of Wnt signaling genes, while TCF3 functions predominantly as a transcriptional repressor. Notably, TCF3 is expressed in different types of stem cells including embryonic and hair follicle stem cells. TCF3 promotes differentiation of embryonic stem cells by counteracting Wnt-mediated maintenance signals <sup>18</sup> . TCF3 is believed to be an important negative regulator of embryonic stem cell self-renewal. Chromosomal translocation t(1;19)(q23;p13.3) which leads to a production of the TCF3-PBX1 (E2A-PBX1) fusion protein was observed in Acute Lymphoblastic Leukemia. Recurrent mutations in TCF3 that promote PI3-kinase signaling were documented in human Burkitt's lymphoma samples <sup>19</sup> . While this gene is upregulated in CTCL it is not known if it is also mutated. |
| LEF1    | LEF1 (Lymphoid enhancer-binding factor 1) is a downstream member of the Wnt/ $\beta$ -catenin signaling pathway. Increased LEF1 expression has been reported as a poor prognostic marker in various hematologic malignancies <sup>20</sup> .                                                                                                                                                                                                                                                                                                                                                                                                                                                                                                                                                                                                                                                                                                    |
| NFKB1   | NFKB1 is a master transcription factor that plays a major role in inflammatory and immune responses. Activation of the NF $\kappa$ B signaling pathway plays a critical role in the development and progression of many types of cancer. NFKB1 was shown to be overexpressed in MF patients and may correlate with poor disease outcome <sup>21</sup> .                                                                                                                                                                                                                                                                                                                                                                                                                                                                                                                                                                                         |
| JUNB    | c-JUN and c-FOS were initially identified as viral oncoproteins and their roles in tumorigenesis are well established. Previous studies documented gain in copy numbers of JUNB in 54% of c-ALCL and 26% of SS/MF patients with strong nuclear expression of JUNB protein in these cancers. Dysregulation of AP-1 expression in CTCL was also shown to be associated with genomic amplification of JUNB in this cancer. JUNB is an important transcriptional regulator of IL-4 expression and is associated with the Th2 phenotype in the advanced CTCL <sup>22</sup> .                                                                                                                                                                                                                                                                                                                                                                         |
| CCL18   | CC chemokine ligand (CCL) 18 is produced by monocytes and dendritic cells and was shown to act as a potent chemoattractant for T and B cells. CCL18 expression is upregulated in atopic dermatitis and bullous pemphigoid. The CTCL lesional skin was shown to express elevated levels of CCL18 mRNA in comparison to normal skin. Further studies showed that dermal macrophages and dendritic cells in CTCL skin were responsible for CCL18 production. Serum levels of this protein were elevated in CTCL and correlate with the types of skin lesions. Patients with high serum levels of CCL18 had more aggressive disease course than patients with low CCL18 levels <sup>23</sup> .                                                                                                                                                                                                                                                      |
| CCR4    | CC chemokine receptor 4 (CCR4) is highly expressed in SS and MF skin in all CTCL subtypes. Expression of CCR4 is limited in non-malignant cells as it is absent in neutrophils, monocytes, B cells and naïve T cells. It is also expressed in fewer than half of all memory T cells. Based on these findings Mogamulizumab, humanized anti-CCR4                                                                                                                                                                                                                                                                                                                                                                                                                                                                                                                                                                                                 |

|                                                                                    |                                                                                                                                                                                                                                                                                                                                                                                                                                                                                                                                                                                                                                                                                                                                                                                                                        |
|------------------------------------------------------------------------------------|------------------------------------------------------------------------------------------------------------------------------------------------------------------------------------------------------------------------------------------------------------------------------------------------------------------------------------------------------------------------------------------------------------------------------------------------------------------------------------------------------------------------------------------------------------------------------------------------------------------------------------------------------------------------------------------------------------------------------------------------------------------------------------------------------------------------|
|                                                                                    | antibody, was proposed as an attractive therapeutic target for CTCL and is currently being tested in patients <sup>24</sup> .                                                                                                                                                                                                                                                                                                                                                                                                                                                                                                                                                                                                                                                                                          |
| STAT5A                                                                             | Upregulation in STAT5 signaling occurs in early CTCL stages. A growing body of experimental evidence suggests that this gene is important for expression of anti-apoptotic proteins (bcl-2 and bcl-x), cell cycle genes (Cyclin D and c-myc) and oncogenic miR-155 microRNA, all working in concert to promote cancerogenesis <sup>25,26</sup> .                                                                                                                                                                                                                                                                                                                                                                                                                                                                       |
| SH2D1A                                                                             | SH2D1A (SH2 domain-containing protein 1A) was shown to be associated with X-linked lymphoproliferative disease <sup>27</sup> .                                                                                                                                                                                                                                                                                                                                                                                                                                                                                                                                                                                                                                                                                         |
| TFRC (CD71)                                                                        | Iron is transported in serum by transferrin and enters the cell via the transferrin receptor (TFRC). In replicating cells iron is required for DNA synthesis and cytochrome function. To meet this need, as proliferating cells exhaust available intracellular iron, they increase their surface expression of TFRC. Activated T cells express surface receptors including CD25 (the IL-2 receptor) and TFRC/CD71. Previous reports document upregulation of T cell activation markers including TFRC/CD71 in CTCL <sup>28</sup> .                                                                                                                                                                                                                                                                                    |
| MXI1                                                                               | MXI1 protein is a basic helix-loop-helix, leucine zipper transcriptional factor that can dimerize with Max protein and bind to specific DNA sequences and suppresses the transcription of genes that are typically transactivated by a c-Myc/Max dimer <sup>29</sup> .                                                                                                                                                                                                                                                                                                                                                                                                                                                                                                                                                 |
| AHI1                                                                               | Abelson Helper Integration site 1 (AHI1) and downstream signaling members, (e.g. CDKN1C), were suggested to play an important role in CTCL carcinogenesis <sup>19,91</sup> . AHI1 is typically activated by provirus insertional mutagenesis in various murine leukemias and lymphomas. Overexpression of this gene was demonstrated in Hut102 and Hut78 CTCL cell lines. One of the putative functions of AHI1 is to suppress CDKN1C <sup>30,31</sup> .                                                                                                                                                                                                                                                                                                                                                               |
| IRF4                                                                               | The IFN regulatory factor 4 gene, also known as multiple myeloma antigen 1 (MUM1), is normally expressed in plasma cells, melanocytes, subset of B cells, and in activated T cells. It is required for B-cell development, plays an important role in Th2, Th17 T-cell differentiation and T-cell cytotoxic function. In some multiple myeloma, IRF4 is involved in t(6;14)(p25;q32) reciprocal translocation, which leads to the juxtaposition of this gene next to the immunoglobulin heavy chain locus. IRF4 rearrangements were previously documented in a subset of diffuse large cell B-cell lymphoma, splenic marginal zone lymphoma, chronic B-cell lymphoid leukemia, transformed MF and ALCL cases. IRF4 locus amplification was observed in a subset of c-ALCL and transformed MF/ SS cases <sup>32</sup> . |
| PLK1                                                                               | Polo-like kinases belong to the serine/threonine kinase family and is critical for mitosis and DNA integrity. PLK1 is one of the most studied members of this family and was found to be upregulated in a variety of cancers. It is also upregulated in the G2/M phase of mitosis. PLK1 was found to be overexpressed in advanced lesions of CTCL and in several CTCL cell lines including HH, Hut78, MyLa, SeAx and SZ4. Downregulation of this gene results in decreased malignant cell proliferation and viability <sup>33</sup> .                                                                                                                                                                                                                                                                                  |
| NAIP                                                                               | NLR apoptosis inhibitory protein (NAIP) is homologous to two baculovirus inhibitor of apoptosis proteins (IAP) and is able to suppress apoptosis induced by various signals <sup>34</sup> . Resistance to apoptosis is believed to be one of the cardinal features of CTCL <sup>34</sup> .                                                                                                                                                                                                                                                                                                                                                                                                                                                                                                                             |
| CCND2                                                                              | CCND2 (G1/S-specific cyclin-D2) upregulation was documented in a subset of CTCL cases and in a variety of leukemias and lymphomas <sup>35</sup> .                                                                                                                                                                                                                                                                                                                                                                                                                                                                                                                                                                                                                                                                      |
| T3JAM                                                                              | T3JAM (TRAF3-interacting JNK-activating modulator) is expressed in bone marrow, spleen and thymus and was shown to promote specific activation of JNK signaling <sup>36</sup> .                                                                                                                                                                                                                                                                                                                                                                                                                                                                                                                                                                                                                                        |
| <b><u>Part B. Genes upregulated in Cluster 2 favorable prognosis patients.</u></b> |                                                                                                                                                                                                                                                                                                                                                                                                                                                                                                                                                                                                                                                                                                                                                                                                                        |
| LCE2B                                                                              | LCE2B (Late Cornified Envelope Protein 2B) is one of at least 20 genes that are expressed during epidermal differentiation. This gene was found to be expressed in normal and psoriatic skin, but not in cultured keratinocytes or in other tested cell types or tissues <sup>37</sup> .                                                                                                                                                                                                                                                                                                                                                                                                                                                                                                                               |



|               |                                                                                                                                                                                                                                                                                                                                                                                                                                                                                                                                                                                                                                                                                                                                                                                      |
|---------------|--------------------------------------------------------------------------------------------------------------------------------------------------------------------------------------------------------------------------------------------------------------------------------------------------------------------------------------------------------------------------------------------------------------------------------------------------------------------------------------------------------------------------------------------------------------------------------------------------------------------------------------------------------------------------------------------------------------------------------------------------------------------------------------|
| CST6          | CTS6 (Cystatin 6), also known as cystatin E/M, is a cysteine protease inhibitor that is downregulated in breast, cervical, glioma, prostate and gastric cancers. Loss of CST6 expression is attributed to promoter hypermethylation. Also, CST6 has been shown to be important for skin differentiation. This gene is proposed to act as a tumor suppressor gene by controlling the activity of a known oncogene, Legumain (LGMN) <sup>38</sup> .                                                                                                                                                                                                                                                                                                                                    |
| LOR           | Loricrin is a major protein component of the cornified cell envelope that is responsible for protective barrier function of the stratum corneum. This gene is expressed in terminally differentiated keratinocytes. Mutations in this gene have been reported in Vohwinkel's keratoderma and progressive symmetric erythrokeratoderma <sup>39</sup> .                                                                                                                                                                                                                                                                                                                                                                                                                                |
| LTBP4         | The extracellular matrix protein LTBP4 (latent transforming growth factor $\beta$ -binding protein 4) belongs to the fibrillin/LTBP family of glycoproteins. These proteins can covalently bind to TGF $\beta$ and play an important role in promoting the folding and secretion of this protein. Dysregulated expression of LTBP isoforms was shown to be associated with epithelial neoplasms. Specifically, LTBP1 is downregulated in neoplasms of the liver, ovaries and neuroendocrine tumors of the digestive system. LTBP2 is downregulated in esophageal squamous cell carcinoma and nasopharyngeal carcinomas. LTBP4 is downregulated in breast adenocarcinomas. Promoter hypermethylation was documented to be the mechanism of downregulation for this gene <sup>40</sup> |
| BCL7A         | BCL7A (B-cell CLL/lymphoma 7A) putative tumor suppressor gene that was previously suggested by us and others to play an important role in CTCL carcinogenesis and progression <sup>20,36,37</sup> . It is often down-regulated in CTCL patients when compared to benign skin conditions. Several mechanisms for this loss of expression have been demonstrated, where BCL7A and the corresponding 12q24.31 region of the chromosome were lost in 56% of patients with CTCL. In another study, 48% of patients exhibited BCL7A promoter hypermethylation. Such promoter hypermethylation was preferentially observed in patients with aggressive CTCL. This gene may be an important prognostic marker in patients with early-stage disease <sup>41-43</sup> .                        |
| CDKN1C        | CDKN1C (Cyclin-Dependent Kinase Inhibitor 1C) belongs to the Cip/Kip family of cyclin-dependent kinase inhibitors, which negatively regulate cell cycle progression by inhibiting G1 cyclin-dependent kinases. Mutations in this gene were identified in patients with Beckwith-Wiedemann syndrome, which is characterized by an over-growth phenotype and an association with several cancers. Hence, loss-of-function of CDKN1C promotes cell proliferation giving rise to an over-growth phenotype <sup>44</sup> . Our previous work suggests that this gene is a downstream target of AHI1 oncogene and its loss may play an important role in CTCL carcinogenesis <sup>31</sup> .                                                                                               |
| PSORS1C2      | PSORS1C2 is a poorly characterized psoriasis susceptibility gene <sup>45</sup> .                                                                                                                                                                                                                                                                                                                                                                                                                                                                                                                                                                                                                                                                                                     |
| WIF1          | WIF1 (WNT inhibitory factor 1) is a WNT/ $\beta$ -catenin signaling inhibitor and was previously shown to be downregulated in salivary gland carcinomas <sup>46</sup> , acute lymphoblastic leukemias <sup>47</sup> and acute myeloid leukemias <sup>48</sup> . Our studies <sup>49,50</sup> for the first time suggest that loss of this gene may also be important for CTCL carcinogenesis.                                                                                                                                                                                                                                                                                                                                                                                        |
| DLEU1         | DLEU1 (Deleted in Lymphocytic Leukemia 1) is a long non-coding RNA putative tumor suppressor gene and is frequently deleted in B-cell chronic lymphocytic leukemia <sup>51</sup> and may have tumor suppressing properties in CTCL <sup>52</sup> .                                                                                                                                                                                                                                                                                                                                                                                                                                                                                                                                   |
| IL-18         | IL-18 proinflammatory cytokine is known to induce expression of interferon- $\gamma$ and promote Th1 immune responses, both of which are associated with disease clearance <sup>53</sup> .                                                                                                                                                                                                                                                                                                                                                                                                                                                                                                                                                                                           |
| IL1F7 (IL-37) | IL1F7 is a target gene upregulated by IL-18 signaling and acts as an inhibitor of innate immunity <sup>54</sup> .                                                                                                                                                                                                                                                                                                                                                                                                                                                                                                                                                                                                                                                                    |
| miR-205       | miR-205 microRNA was documented to act as putative tumor suppressor gene that targets E2F1 in melanoma and other cancers and has the ability to distinguish CTCL from other benign entities <sup>55</sup> .                                                                                                                                                                                                                                                                                                                                                                                                                                                                                                                                                                          |

| <b><u>Part C. Genes upregulated in Cluster 3 intermediate prognosis patients.</u></b> |                                                                                                                                                                                                                                                                                                                                                                                                                                                                                                                                        |
|---------------------------------------------------------------------------------------|----------------------------------------------------------------------------------------------------------------------------------------------------------------------------------------------------------------------------------------------------------------------------------------------------------------------------------------------------------------------------------------------------------------------------------------------------------------------------------------------------------------------------------------|
| FOSL1                                                                                 | FOSL1 (Fos-Like Antigen 1), also known as FRA1, forms a part of the AP-1 complex. Gain of function of this oncogene has been linked to the enhanced migration and invasion of colorectal breast, lung, bladder, head and neck, thyroid and brain carcinomas. FOSL1 expression is induced by RAS-ERK and Wnt/ $\beta$ -catenin pathways <sup>56</sup> .                                                                                                                                                                                 |
| SERPINB4                                                                              | SERPINB4, also known as squamous cell carcinoma antigen 2 (SCCA2), is a member of the ovalbumin family of serine proteinase inhibitors. It was originally isolated from metastatic cervical squamous cell carcinoma. SERPINB4 is expressed primarily in malignant cells and correlates with more aggressive tumors <sup>57</sup> .                                                                                                                                                                                                     |
| EVA1                                                                                  | EVA1 (Epithelial V-like antigen 1), also known as MPZL2 is expressed in the thymus early in embryogenesis and subsequently is downregulated during thymocyte developmental progression. It is believed to contribute to the earliest phases of thymus organogenesis <sup>58</sup> .                                                                                                                                                                                                                                                    |
| MMP12                                                                                 | MMP12 (matrix metalloproteinase-12) also known as a macrophage metalloelastase or macrophage elastase is an enzyme involved in the breakdown of extracellular matrix in normal physiological and pathological processes. MMP12 may play a role in aneurysm formation, in the development of emphysema and was recently shown to promote migration and invasion in nasopharyngeal carcinoma <sup>59</sup> .                                                                                                                             |
| SELE                                                                                  | SELE (E-selectin), also known as CD62 antigen-like family member E (CD62E), endothelial-leukocyte adhesion molecule 1 (ELAM-1), or leukocyte-endothelial cell adhesion molecule 2 (LECAM2), is a cell adhesion molecule expressed by activated endothelial cells. It plays an important role in inflammation. Previous studies that analyzed E-selectin staining in blood vessels showed differences between various disease groups and healthy controls, with the highest percentages being observed in CTCL patients <sup>60</sup> . |
| CCL26                                                                                 | CC chemokine CCL26, also known as eotaxin-3, is a potent chemoattractant and was shown to correlate with the clinical itch burden in CTCL patients <sup>61</sup> .                                                                                                                                                                                                                                                                                                                                                                     |
| PLS3                                                                                  | PLS3 (Plastin-3) is an actin-binding protein, which is not normally expressed in T cells. It was shown that the promoter for this gene is demethylated in cancer. The normal function is to regulate actin structure elongation. This gene is associated with SS cell survival and migration and was shown to be overexpressed in SS cells by many studies <sup>62</sup> .                                                                                                                                                             |

**Supplementary Table 2.** Detailed description of the 52 genes that fit into the three signature pattern expression model and their putative functions in CTCL and other malignancies.

| Analysis of Maximum Likelihood Estimates (Cox Model) |                                      |
|------------------------------------------------------|--------------------------------------|
| Patient Characteristics                              | Odds Ratio for Progression (p value) |
| Age                                                  |                                      |
| < 40                                                 | 1.77 (p=0.51)                        |
| 40-59                                                | 1.48 (p=0.50)                        |
| ≥ 60                                                 | 1 (reference)                        |
| Sex                                                  |                                      |
| Male                                                 | 1.65 (p=0.25)                        |
| Female                                               | 1 (reference)                        |
| Clinical Stage at the Time of Diagnosis              |                                      |
| Stage I                                              | 1 (reference)                        |
| Stage II                                             | 4.7 (p=0.005)                        |
| Stage ≥ III                                          | 12.0 (p<0.0001)                      |

**Supplementary Table 3.** Multivariate analysis of patient characteristics that are associated with clinical disease progression.

| Gene Name                                                              | Putative biological role and importance in cancer/CTCL. |
|------------------------------------------------------------------------|---------------------------------------------------------|
| <b><u>Part A. Genes preferentially expressed in CTCL patients.</u></b> |                                                         |
| CCL26                                                                  | Please see Supplementary Table 2C for more details.     |
| CCL18                                                                  | Please see Supplementary Table 2A for more details.     |
| FYB                                                                    | Please see Supplementary Table 2A for more details.     |
| IL2RA                                                                  | Please see Supplementary Table 2A for more details.     |
| LEF1                                                                   | Please see Supplementary Table 2A for more details.     |
| LCK                                                                    | Please see Supplementary Table 2A for more details.     |
| ITK                                                                    | Please see Supplementary Table 2A for more details.     |
| TOX                                                                    | Please see Supplementary Table 2A for more details.     |
| CCR4                                                                   | Please see Supplementary Table 2A for more details.     |
| GNLY                                                                   | Please see Supplementary Table 2A for more details.     |
| MMP12                                                                  | Please see Supplementary Table 2C for more details.     |
| T3JAM                                                                  | Please see Supplementary Table 2A for more details.     |
| IL1F7                                                                  | Please see Supplementary Table 2B for more details.     |
| IL-22                                                                  | Please see Supplementary Table 2A for more details.     |
| IL-26                                                                  | Please see Supplementary Table 2A for more details.     |
| STAT5A                                                                 | Please see Supplementary Table 2A for more details.     |
| SYCP1                                                                  | Please see Supplementary Table 2A for more details.     |
| GTSF1                                                                  | Please see Supplementary Table 2A for more details.     |

|                                                                                                                          |                                                                                                                                                                                                                                                                                                                                                                                                                                                                            |
|--------------------------------------------------------------------------------------------------------------------------|----------------------------------------------------------------------------------------------------------------------------------------------------------------------------------------------------------------------------------------------------------------------------------------------------------------------------------------------------------------------------------------------------------------------------------------------------------------------------|
| cTAGE1                                                                                                                   | This cancer testis antigen was documented to be ectopically expressed in CTCL. cTAGE1 (Cutaneous T-Cell Lymphoma-Associated Antigen 1) is robustly expressed in the majority of CTCL patients and patient-derived cell lines <sup>11</sup> .                                                                                                                                                                                                                               |
| CDO1                                                                                                                     | CDO1 (cysteine dioxygenase) was shown to be consistently overexpressed in SS patients and is the rate-limiting enzyme in the synthesis of taurine, an important semi-essential amino acid. CDO1 is not usually expressed in peripheral blood. The expression of this gene was documented in liver and brain. The CDO1 promoter, is believed to be under the regulation of c-myc, which is consistently overexpressed in PBMCs from SS, but not MF patients <sup>63</sup> . |
| THAP11                                                                                                                   | THAP11 (Thanatos-associated protein 11), also known as Ronin, is essential for the self-renewal of embryonic stem (ES) cells. This gene contributes to ES cell pluripotency by regulating the transcription of genes involved in the metabolic processes that sustain the growth of self-renewing ES cells <sup>64</sup> .                                                                                                                                                 |
| STAT4                                                                                                                    | STAT4 appears to be overexpressed in the early stages of CTCL when compared to benign skin diseases <sup>52</sup> . The expression of STAT4 is required for Th1 differentiation. The expression of this gene is lost in advanced CTCL with concomitant shift towards the Th2 phenotype <sup>26,65,66</sup> . Loss of STAT4 expression appears to be a robust and reliable diagnostic marker for SS <sup>66</sup> .                                                         |
| <b><u>Part B. Genes preferentially expressed in normal skin and in patients with benign inflammatory dermatoses.</u></b> |                                                                                                                                                                                                                                                                                                                                                                                                                                                                            |
| WIF1                                                                                                                     | Please see Supplementary Table 2B for more details.                                                                                                                                                                                                                                                                                                                                                                                                                        |
| BCL7A                                                                                                                    | Please see Supplementary Table 2B for more details.                                                                                                                                                                                                                                                                                                                                                                                                                        |
| PSORS1C2                                                                                                                 | Please see Supplementary Table 2B for more details.                                                                                                                                                                                                                                                                                                                                                                                                                        |
| DMAP1                                                                                                                    | DMAP1 participates in DNA repair by directly interacting with PCNA. DMAP1-depleted cells in p53-deficient background demonstrate chromosomal instability and tumor formation in mice. Recent reports indicate that DMAP1 acts as a tumor suppressor by maintaining chromosomal integrity <sup>67</sup> .                                                                                                                                                                   |
| SERPINB13                                                                                                                | SERPINB13 is an inhibitor of lysosomal cathepsin enzymes K and L and was shown to be downregulated in the head and neck cancers. Cathepsin K promotes cancer cell invasion via degradation of the extracellular matrix <sup>68</sup> .                                                                                                                                                                                                                                     |

**Supplementary Table 4.** Description of genes that are able to distinguish CTCL from benign dermatoses and their putative roles in CTCL and other malignancies.

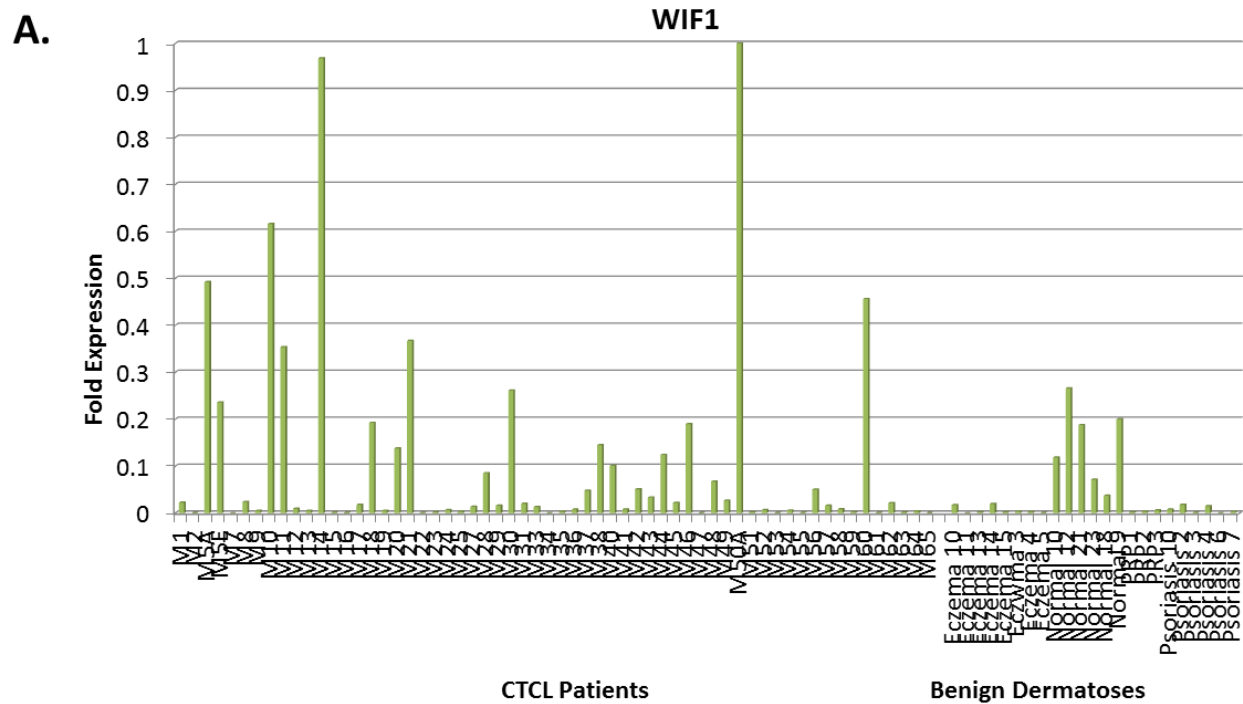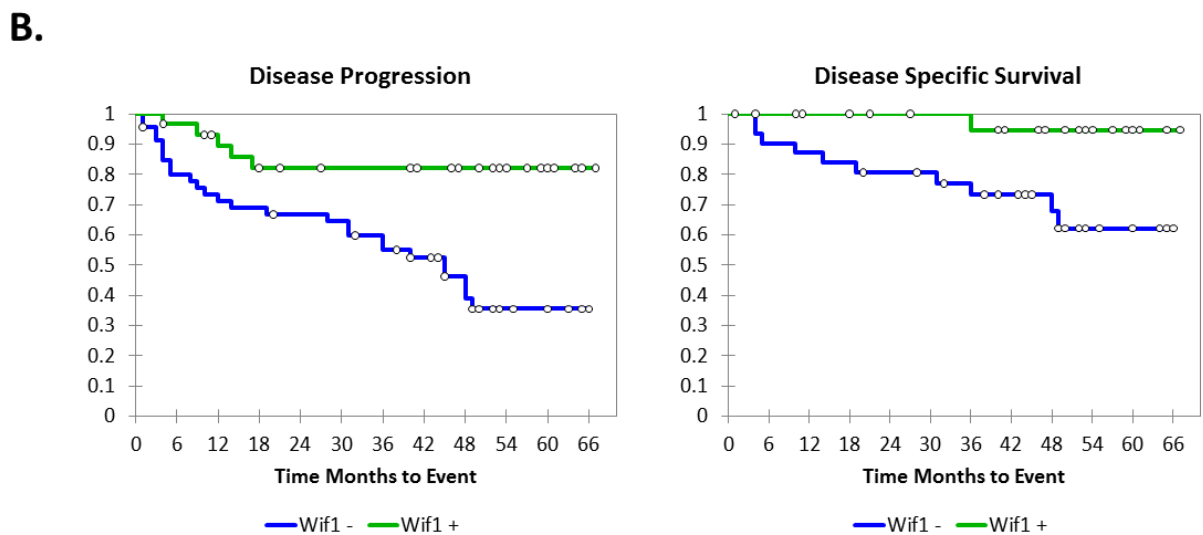

**Supplementary Figure 1. A.** WIF1 (Wnt Inhibitory Factor 1) gene is expressed in normal skin and CTCL lesional skin in a subset of patients. **B.** Correlation of WIF1 expression in CTCL patients with disease progression. Kaplan-Meier analysis documents that loss of WIF1 expression is associated with poor CTCL disease progression (left panel,  $p=0.002$ ). Disease progression is defined as a progression to a higher clinical stage and/or death. Loss of WIF1 is also associated with poor cancer-specific survival (right panel,  $p=0.012$ ).

## References:

1. Troncone E, Marafini I, Pallone F, Monteleone G. Th17 cytokines in inflammatory bowel diseases: discerning the good from the bad. *Int Rev Immunol*. 2013;32(5-6):526-533.
2. van der Fits L, Out-Luiting JJ, Tensen CP, Zoutman WH, Vermeer MH. Exploring the IL-21 - STAT3 axis as therapeutic target for Sezary syndrome. *J Invest Dermatol*. 2014.
3. Krejsgaard T, Ralfkiaer U, Clasen-Linde E, et al. Malignant cutaneous T-cell lymphoma cells express IL-17 utilizing the Jak3/Stat3 signaling pathway. *J Invest Dermatol*. 2011;131(6):1331-1338.
4. Fujita H. The role of IL-22 and Th22 cells in human skin diseases. *J Dermatol Sci*. 2013;72(1):3-8.
5. Miyagaki T, Sugaya M, Suga H, et al. IL-22, but not IL-17, dominant environment in cutaneous T-cell lymphoma. *Clin Cancer Res*. 2011;17(24):7529-7538.
6. Foss FM, Waldmann TA. Interleukin-2 receptor-directed therapies for cutaneous lymphomas. *Hematol Oncol Clin North Am*. 2003;17(6):1449-1458.
7. Eriksen KW, Kaltoft K, Mikkelsen G, et al. Constitutive STAT3-activation in Sezary syndrome: tyrphostin AG490 inhibits STAT3-activation, interleukin-2 receptor expression and growth of leukemic Sezary cells. *Leukemia*. 2001;15(5):787-793.
8. Pastor RM, Burch JD, Magnuson S, et al. Discovery and optimization of indazoles as potent and selective interleukin-2 inducible T cell kinase (ITK) inhibitors. *Bioorg Med Chem Lett*. 2014;24(11):2448-2452.
9. Mao X, McElwaine S. Functional copy number changes in Sezary syndrome: toward an integrated molecular cytogenetic map III. *Cancer Genet Cytogenet*. 2008;185(2):86-94.
10. Kitamura N, Katagiri YU, Itagaki M, et al. The expression of granulysin in systemic anaplastic large cell lymphoma in childhood. *Leuk Res*. 2009;33(7):908-912.
11. Litvinov IV, Cordeiro B, Huang Y, et al. Ectopic expression of cancer testis antigens in Cutaneous T-Cell Lymphoma (CTCL) patients. *Clin Cancer Res*. 2014.
12. van Kester MS, Borg MK, Zoutman WH, et al. A meta-analysis of gene expression data identifies a molecular signature characteristic for tumor-stage mycosis fungoides. *J Invest Dermatol*. 2012;132(8):2050-2059.
13. Strubin M, Newell JW, Matthias P. OBF-1, a novel B cell-specific coactivator that stimulates immunoglobulin promoter activity through association with octamer-binding proteins. *Cell*. 1995;80(3):497-506.
14. Krejsgaard T, Vetter-Kauczok CS, Woetmann A, et al. Ectopic expression of B-lymphoid kinase in cutaneous T-cell lymphoma. *Blood*. 2009;113(23):5896-5904.
15. Gaspar-Maia A, Alajem A, Polesso F, et al. Chd1 regulates open chromatin and pluripotency of embryonic stem cells. *Nature*. 2009;460(7257):863-868.
16. McGirt LY, Necessary CA, Baerenwald DA, et al. TOX expression and role in CTCL. *Journal of Investigative Dermatology*. 2014;134:S31-S31.
17. Huang Y, Litvinov IV, Wang Y, et al. Thymocyte selection-associated high mobility group box gene (TOX) is aberrantly over-expressed in mycosis fungoides and correlates with poor prognosis. *Oncotarget*. 2014;5(12):4418-4425.
18. Kuwahara A, Sakai H, Xu Y, Itoh Y, Hirabayashi Y, Gotoh Y. Tcf3 Represses Wnt-beta-Catenin Signaling and Maintains Neural Stem Cell Population during Neocortical Development. *PLoS One*. 2014;9(5):e94408.
19. Spender LC, Inman GJ. Developments in Burkitt's lymphoma: novel cooperations in oncogenic MYC signaling. *Cancer Manag Res*. 2014;6:27-38.
20. Albano F, Zagaria A, Anelli L, et al. Lymphoid enhancer binding factor-1 (LEF1) expression as a prognostic factor in adult acute promyelocytic leukemia. *Oncotarget*. 2014;5(3):649-658.
21. Izban KF, Ergin M, Qin JZ, et al. Constitutive expression of NF-kappa B is a characteristic feature of mycosis fungoides: implications for apoptosis resistance and pathogenesis. *Hum Pathol*. 2000;31(12):1482-1490.
22. Mao X, Orchard G, Lillington DM, et al. BCL2 and JUNB abnormalities in primary cutaneous lymphomas. *Br J Dermatol*. 2004;151(3):546-556.
23. Miyagaki T, Sugaya M, Suga H, et al. Increased CCL18 expression in patients with cutaneous T-cell lymphoma: association with disease severity and prognosis. *J Eur Acad Dermatol Venereol*. 2013;27(1):e60-67.

24. Han T, Abdel-Motal UM, Chang DK, et al. Human anti-CCR4 minibody gene transfer for the treatment of cutaneous T-cell lymphoma. *PLoS One*. 2012;7(9):e44455.
25. Litvinov IV, Pehr K, Sasseville D. Connecting the dots in cutaneous T cell lymphoma (CTCL): STAT5 regulates malignant T cell proliferation via miR-155. *Cell Cycle*. 2013;12(14):2172-2173.
26. Cordeiro B, Litvinov I, Zargham H, et al. Analysis of signal transducers and activators of transcription (STAT) mRNA and protein expression in cutaneous T-cell lymphoma (CTCL) patients and patient-derived cell lines. *Journal of Investigative Dermatology*. 2014;134:S30-S30.
27. Shlapatska LM, Kovalevska LM, Gordiienko IM, Sidorenko SP. Intrinsic defect in B-lymphoblastoid cell lines from patients with X-linked lymphoproliferative disease type 1. I. Cell surface phenotype and functional studies. *Exp Oncol*. 2014;36(1):2-8.
28. Asadullah K, Friedrich M, Docke WD, Jahn S, Volk HD, Sterry W. Enhanced expression of T-cell activation and natural killer cell antigens indicates systemic anti-tumor response in early primary cutaneous T-cell lymphoma. *J Invest Dermatol*. 1997;108(5):743-747.
29. Kawamata N, Sugimoto KJ, Sakajiri S, Oshimi K, Koeffler HP. Mxi1 isoforms are expressed in hematological cell lines and normal bone marrow. *Int J Oncol*. 2005;26(5):1369-1375.
30. Kennah E, Ringrose A, Zhou LL, et al. Identification of tyrosine kinase, HCK, and tumor suppressor, BIN1, as potential mediators of AHI-1 oncogene in primary and transformed CTCL cells. *Blood*. 2009;113(19):4646-4655.
31. Litvinov IV, Kupper TS, Sasseville D. The role of AHI1 and CDKN1C in cutaneous T-cell lymphoma progression. *Experimental Dermatology*. 2012;21(12):964-966.
32. Pham-Ledard A, Prochazkova-Carlotti M, Laharanne E, et al. IRF4 gene rearrangements define a subgroup of CD30-positive cutaneous T-cell lymphoma: a study of 54 cases. *J Invest Dermatol*. 2010;130(3):816-825.
33. Stutz N, Nihal M, Wood GS. Polo-like kinase 1 (Plk1) in cutaneous T-cell lymphoma. *Br J Dermatol*. 2011;164(4):814-821.
34. Tenthorey JL, Kofoed EM, Daugherty MD, Malik HS, Vance RE. Molecular basis for specific recognition of bacterial ligands by NAIP/NLRC4 inflammasomes. *Mol Cell*. 2014;54(1):17-29.
35. Igawa T, Sato Y, Takata K, et al. Cyclin D2 is overexpressed in proliferation centers of chronic lymphocytic leukemia/small lymphocytic lymphoma. *Cancer Sci*. 2011;102(11):2103-2107.
36. Dadgostar H, Doyle SE, Shahangian A, Garcia DE, Cheng G. T3JAM, a novel protein that specifically interacts with TRAF3 and promotes the activation of JNK(1). *FEBS Lett*. 2003;553(3):403-407.
37. de Koning HD, van den Bogaard EH, Bergboer JG, et al. Expression profile of cornified envelope structural proteins and keratinocyte differentiation-regulating proteins during skin barrier repair. *Br J Dermatol*. 2012;166(6):1245-1254.
38. D'Costa ZC, Higgins C, Ong CW, et al. TBX2 represses CST6 resulting in uncontrolled legumain activity to sustain breast cancer proliferation: a novel cancer-selective target pathway with therapeutic opportunities. *Oncotarget*. 2014;5(6):1609-1620.
39. Ishida-Yamamoto A. Loricrin keratoderma: a novel disease entity characterized by nuclear accumulation of mutant loricrin. *J Dermatol Sci*. 2003;31(1):3-8.
40. Bultmann I, Conradi A, Kretschmer C, Sterner-Kock A. Latent transforming growth factor beta-binding protein 4 is downregulated in esophageal cancer via promoter methylation. *PLoS One*. 2013;8(5):e65614.
41. Carbone A, Bernardini L, Valenzano F, et al. Array-based comparative genomic hybridization in early-stage mycosis fungoides: recurrent deletion of tumor suppressor genes BCL7A, SMAC/DIABLO, and RHOF. *Genes Chromosomes Cancer*. 2008;47(12):1067-1075.
42. Litvinov IV, Zhou Y, Kupper TS, Sasseville D. Loss of BCL7A expression correlates with poor disease prognosis in patients with early-stage cutaneous T-cell lymphoma. *Leuk Lymphoma*. 2012.
43. van Doorn R, Zoutman WH, Dijkman R, et al. Epigenetic profiling of cutaneous T-cell lymphoma: promoter hypermethylation of multiple tumor suppressor genes including BCL7a, PTPRG, and p73. *J Clin Oncol*. 2005;23(17):3886-3896.
44. Hamajima N, Johmura Y, Suzuki S, Nakanishi M, Saitoh S. Increased protein stability of CDKN1C causes a gain-of-function phenotype in patients with IMAGE syndrome. *PLoS One*. 2013;8(9):e75137.



45. Orru S, Giuressi E, Carcassi C, Casula M, Contu L. Mapping of the major psoriasis-susceptibility locus (PSORS1) in a 70-Kb interval around the corneodesmosin gene (CDSN). *Am J Hum Genet.* 2005;76(1):164-171.
46. Ramachandran I, Ganapathy V, Gillies E, et al. Wnt inhibitory factor 1 suppresses cancer stemness and induces cellular senescence. *Cell Death Dis.* 2014;5:e1246.
47. Roman-Gomez J, Cordeu L, Agirre X, et al. Epigenetic regulation of Wnt-signaling pathway in acute lymphoblastic leukemia. *Blood.* 2007;109(8):3462-3469.
48. Griffiths EA, Gore SD, Hooker C, et al. Acute myeloid leukemia is characterized by Wnt pathway inhibitor promoter hypermethylation. *Leuk Lymphoma.* 2010;51(9):1711-1719.
49. Litvinov IV, Jones DA, Sasseville D, Kupper TS. Transcriptional profiles predict disease outcome in patients with cutaneous T-cell lymphoma. *Clin Cancer Res.* 2010;16(7):2106-2114.
50. Shin J, Monti S, Aires DJ, et al. Lesional gene expression profiling in cutaneous T-cell lymphoma reveals natural clusters associated with disease outcome. *Blood.* 2007;110(8):3015-3027.
51. Liu Y, Corcoran M, Rasool O, et al. Cloning of two candidate tumor suppressor genes within a 10 kb region on chromosome 13q14, frequently deleted in chronic lymphocytic leukemia. *Oncogene.* 1997;15(20):2463-2473.
52. Tracey L, Villuendas R, Dotor AM, et al. Mycosis fungoides shows concurrent deregulation of multiple genes involved in the TNF signaling pathway: an expression profile study. *Blood.* 2003;102(3):1042-1050.
53. Jawed SI, Myskowski PL, Horwitz S, Moskowitz A, Querfeld C. Primary cutaneous T-cell lymphoma (mycosis fungoides and Sezary syndrome): part II. Prognosis, management, and future directions. *J Am Acad Dermatol.* 2014;70(2):223 e221-217; quiz 240-222.
54. Nold MF, Nold-Petry CA, Zepp JA, Palmer BE, Bufler P, Dinarello CA. IL-37 is a fundamental inhibitor of innate immunity. *Nat Immunol.* 2010;11(11):1014-1022.
55. Mittal A, Chitkara D, Behrman SW, Mahato RI. Efficacy of gemcitabine conjugated and miRNA-205 complexed micelles for treatment of advanced pancreatic cancer. *Biomaterials.* 2014.
56. Diesch J, Sanij E, Gilan O, et al. Widespread FRA1-dependent control of mesenchymal transdifferentiation programs in colorectal cancer cells. *PLoS One.* 2014;9(3):e88950.
57. Schneider SS, Schick C, Fish KE, et al. A serine proteinase inhibitor locus at 18q21.3 contains a tandem duplication of the human squamous cell carcinoma antigen gene. *Proc Natl Acad Sci U S A.* 1995;92(8):3147-3151.
58. Guttinger M, Sutti F, Panigada M, et al. Epithelial V-like antigen (EVA), a novel member of the immunoglobulin superfamily, expressed in embryonic epithelia with a potential role as homotypic adhesion molecule in thymus histogenesis. *J Cell Biol.* 1998;141(4):1061-1071.
59. Chung IC, Chen LC, Chung AK, et al. Matrix metalloproteinase 12 is induced by heterogeneous nuclear ribonucleoprotein K and promotes migration and invasion in nasopharyngeal carcinoma. *BMC Cancer.* 2014;14(1):348.
60. Lopez-Lerma I, Estrach MT. [Comparative analysis of the expression of cell adhesion molecules in cutaneous T-cell lymphomas (mycosis fungoides/Sezary syndrome) and inflammatory skin diseases]. *Actas Dermosifiliogr.* 2010;101(10):866-877.
61. Suga H, Sugaya M, Miyagaki T, et al. Association of nerve growth factor, chemokine (C-C motif) ligands and immunoglobulin E with pruritus in cutaneous T-cell lymphoma. *Acta Derm Venereol.* 2013;93(2):144-149.
62. Dulmage BO, Geskin LJ. Lessons learned from gene expression profiling of cutaneous T-cell lymphoma. *Br J Dermatol.* 2013;169(6):1188-1197.
63. Booken N, Gratchev A, Utikal J, et al. Sezary syndrome is a unique cutaneous T-cell lymphoma as identified by an expanded gene signature including diagnostic marker molecules CDO1 and DNMT3. *Leukemia.* 2008;22(2):393-399.
64. DeJozey M, Levine SS, Frampton GM, et al. Ronin/Hcf-1 binds to a hyperconserved enhancer element and regulates genes involved in the growth of embryonic stem cells. *Genes Dev.* 2010;24(14):1479-1484.
65. Showe LC, Fox FE, Williams D, Au K, Niu Z, Rook AH. Depressed IL-12-mediated signal transduction in T cells from patients with Sezary syndrome is associated with the absence of IL-12 receptor beta 2 mRNA and highly reduced levels of STAT4. *J Immunol.* 1999;163(7):4073-4079.
66. Nebozhyn M, Loboda A, Kari L, et al. Quantitative PCR on 5 genes reliably identifies CTCL patients with 5% to 99% circulating tumor cells with 90% accuracy. *Blood.* 2006;107(8):3189-3196.

67. Negishi M, Chiba T, Saraya A, Miyagi S, Iwama A. Dmap1 plays an essential role in the maintenance of genome integrity through the DNA repair process. *Genes Cells*. 2009;14(11):1347-1357.
68. Boyapati A, Ren B, Zhang DE. SERPINB13 is a novel RUNX1 target gene. *Biochem Biophys Res Commun*. 2011;411(1):115-120.
